# Supplementary material for: Zeolite shape selectivity impact on LDPE and PP catalytic pyrolysis products and coke nature
Source: Royal Society of Chemistry journal article supplement (doi:10.1039/d2se00146b), 2022-01-01
Supplement: d2se00146b1.pdf [file d2se00146b1.pdf]

## Supplementary information

### Catalytic pyrolysis of LDPE and PP over zeolites in a stirred tank reactor

*MD M. Hasan<sup>a,b</sup>, Nuno Batalha<sup>a,c,d,\*</sup>, Gabriel L. L. Fraga<sup>a</sup>, Mohamed H. M. Ahmed<sup>b</sup>, L.*

*Pinard<sup>c</sup>, Muxina Konarova<sup>b</sup>, Bronwyn Laycock<sup>a</sup>, Steven Pratt<sup>a</sup>*

<sup>a</sup>School of Chemical Engineering, Faculty of Engineering, Architecture and Information Technology, University of Queensland, St Lucia, QLD 4072, Australia

<sup>b</sup>Australian Institute of Bioengineering and Nanotechnology (AIBN), University of Queensland, St Lucia, QLD 4072, Australia

<sup>c</sup>Institut de Chimie des Milieux et Matériaux de Poitiers (IC2MP), Université de Poitiers, CNRS, F-86073 Poitiers, France

<sup>d</sup>Université de Lyon, Institut de Recherches sur la Catalyse et l'Environnement de Lyon (IRCELYON), UMR5256 CNRS-UCB Lyon 1, 2 Avenue Albert Einstein, 69626, Villeurbanne Cedex, France

\* Corresponding Author: [nuno.rocha-batalha@ircelyon.univ-lyon1.fr](mailto:nuno.rocha-batalha@ircelyon.univ-lyon1.fr)

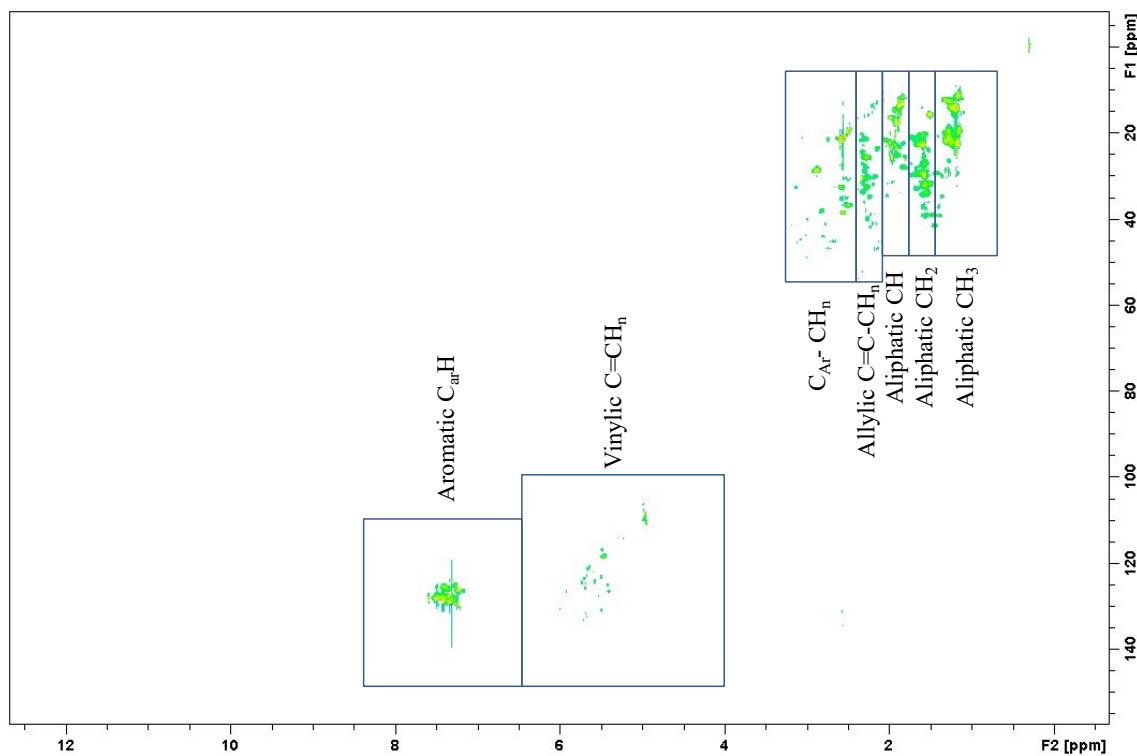

Figure S1.  $^1\text{H}$  -  $^{13}\text{C}$  HSQC NMR of liquid product obtained from the catalytic pyrolysis of PP over ZSM-5. Table S1 includes the integration area considered for each C-H bond type.

Table S1. CH bond allocation range in  $^1\text{H}$  -  $^{13}\text{C}$  HSQC NMR.

|                                         | $^1\text{H}$ range<br>(ppm) | $^{13}\text{C}$ range<br>(ppm) |
|-----------------------------------------|-----------------------------|--------------------------------|
| Aliphatic $\text{CH}_3$                 | 1.4 – 0.7                   | 50 - 5                         |
| Aliphatic $\text{CH}_2$                 | 1.8 – 1.4                   | 50 - 5                         |
| Aliphatic CH                            | 2.1 – 1.4                   | 50 - 5                         |
| Allylic $\text{C}=\text{C}-\text{CH}_n$ | 2.4 – 2.1                   | 55 - 5                         |
| $\text{C}_{\text{Ar}}-\text{CH}_n$      | 3.2 – 2.4                   | 55 - 5                         |
| Vinyllic $\text{C}=\text{CH}_n$         | 6.5 -4.5                    | 150 - 100                      |
| Aromatic $\text{C}_{\text{Ar}}\text{H}$ | 8.0 – 6.5                   | 150 - 110                      |
